# Supplementary material for: Water-stable LnIII-based coordination polymers displaying slow magnetic relaxation and luminescence sensing properties
Source: Royal Society of Chemistry journal article supplement (doi:10.1039/d0nj00828a), 2020-01-01
Supplement: d0nj00828a1.pdf [file d0nj00828a1.pdf]

Electronic Supplementary Material (ESI) for New Journal of Chemistry.

## Supporting Information

### Water-stable Ln<sup>III</sup>-based coordination polymers displaying slow magnetic relaxation and luminescent sensing properties

Wei Gao, Ai-Mei Zhou, Han Wei, Cui-Li Wang, Jie-Ping Liu and Xiu-Mei Zhang\*

**Table S1** Crystallographic Details for CPs 1-6.

| Compounds                                 | Sm-CP (1)                                                                      | Eu-CP (2)                                                                      | Gd-CP (3)                                                                      | Tb-CP (4)                                                                      | Dy-CP (5)                                                                      | Ho-CP (6)                                                                      |
|-------------------------------------------|--------------------------------------------------------------------------------|--------------------------------------------------------------------------------|--------------------------------------------------------------------------------|--------------------------------------------------------------------------------|--------------------------------------------------------------------------------|--------------------------------------------------------------------------------|
| Empirical formula                         | C <sub>42</sub> H <sub>34</sub> Sm <sub>2</sub> N <sub>4</sub> O <sub>19</sub> | C <sub>42</sub> H <sub>34</sub> Eu <sub>2</sub> N <sub>4</sub> O <sub>19</sub> | C <sub>42</sub> H <sub>34</sub> Gd <sub>2</sub> N <sub>4</sub> O <sub>19</sub> | C <sub>42</sub> H <sub>34</sub> Tb <sub>2</sub> N <sub>4</sub> O <sub>19</sub> | C <sub>42</sub> H <sub>34</sub> Dy <sub>2</sub> N <sub>4</sub> O <sub>19</sub> | C <sub>42</sub> H <sub>34</sub> Ho <sub>2</sub> N <sub>4</sub> O <sub>19</sub> |
| Formula weight                            | 1199.45                                                                        | 1202.65                                                                        | 1213.23                                                                        | 1216.59                                                                        | 1223.73                                                                        | 1228.59                                                                        |
| Crystal system                            | Monoclinic                                                                     | Monoclinic                                                                     | Monoclinic                                                                     | Monoclinic                                                                     | Monoclinic                                                                     | Monoclinic                                                                     |
| Space group                               | <i>P2<sub>1</sub>/c</i>                                                        | <i>P2<sub>1</sub>/c</i>                                                        | <i>P2<sub>1</sub>/c</i>                                                        | <i>P2<sub>1</sub>/c</i>                                                        | <i>P2<sub>1</sub>/c</i>                                                        | <i>P2<sub>1</sub>/c</i>                                                        |
| <i>a</i> /Å                               | 16.044(3)                                                                      | 16.050(3)                                                                      | 16.026(2)                                                                      | 16.013(3)                                                                      | 16.044(6)                                                                      | 16.010(5)                                                                      |
| <i>b</i> /Å                               | 13.665(3)                                                                      | 13.653(3)                                                                      | 13.6349(17)                                                                    | 13.636(3)                                                                      | 13.656(5)                                                                      | 13.588(4)                                                                      |
| <i>c</i> /Å                               | 23.654(3)                                                                      | 23.678(3)                                                                      | 23.5391(19)                                                                    | 23.533(3)                                                                      | 23.514(7)                                                                      | 23.465(5)                                                                      |
| $\beta$ /°                                | 123.091(9)                                                                     | 123.116(9)                                                                     | 122.957(5)                                                                     | 123.104(9)                                                                     | 123.001(18)                                                                    | 123.070(14)                                                                    |
| <i>V</i> /Å <sup>3</sup>                  | 4344.8(14)                                                                     | 4345.8(14)                                                                     | 4315.9(8)                                                                      | 4304.4(14)                                                                     | 4321(3)                                                                        | 4278(2)                                                                        |
| <i>Z</i>                                  | 4                                                                              | 4                                                                              | 4                                                                              | 4                                                                              | 4                                                                              | 4                                                                              |
| <i>D<sub>c</sub></i> (g m <sup>-3</sup> ) | 1.834                                                                          | 1.838                                                                          | 1.867                                                                          | 1.877                                                                          | 1.881                                                                          | 1.908                                                                          |
| $\mu$ (mm <sup>-1</sup> )                 | 2.762                                                                          | 2.945                                                                          | 3.133                                                                          | 3.345                                                                          | 3.518                                                                          | 3.759                                                                          |
| <i>F</i> (000)                            | 2360                                                                           | 2368                                                                           | 2375                                                                           | 2383                                                                           | 2391                                                                           | 2399                                                                           |

|                            |        |        |        |        |        |        |
|----------------------------|--------|--------|--------|--------|--------|--------|
| Reflns collected           | 26993  | 26886  | 27013  | 26736  | 25556  | 26645  |
| Unique reflections         | 9915   | 9932   | 9962   | 9877   | 9676   | 9801   |
| GOF on $F^2$               | 1.032  | 1.032  | 0.997  | 0.995  | 1.013  | 1.031  |
| $R_{\text{int}}$           | 0.0307 | 0.0311 | 0.0444 | 0.0327 | 0.0506 | 0.0377 |
| $R_1$ [ $I > 2\sigma(I)$ ] | 0.0249 | 0.0248 | 0.0320 | 0.0243 | 0.0340 | 0.0281 |
| $wR_2$ (all data)          | 0.0584 | 0.0584 | 0.0653 | 0.0565 | 0.0842 | 0.0630 |

**Table S2** Selected bond lengths (Å) and angles (°) for Sm-CP (**1**)

|              |            |              |           |
|--------------|------------|--------------|-----------|
| Sm1-O7A      | 2.3086(19) | Sm1-O2       | 2.390(2)  |
| Sm1-O11      | 2.3928(18) | Sm1-O8B      | 2.432(2)  |
| Sm1-O4C      | 2.441(2)   | Sm1-O14D     | 2.462(2)  |
| Sm1-O13D     | 2.497(2)   | Sm1-O9B      | 2.533(2)  |
| Sm2-O18      | 2.347(3)   | Sm2-O6       | 2.368(2)  |
| Sm2-O3C      | 2.372(2)   | Sm2-O12      | 2.473(2)  |
| Sm2-O17      | 2.476(2)   | Sm2-O16      | 2.476(2)  |
| Sm2-O1       | 2.501(2)   | Sm2-O2       | 2.626(2)  |
| Sm2-O11      | 2.704(2)   |              |           |
| O7A-Sm1-O2   | 74.60(7)   | O7A-Sm1-O11  | 140.90(7) |
| O2-Sm1-O11   | 74.35(7)   | O7A-Sm1-O8B  | 81.14(7)  |
| O2-Sm1-O8B   | 90.55(7)   | O11-Sm1-O8B  | 122.19(7) |
| O7A-Sm1-O4C  | 85.20(8)   | O2-Sm1-O4C   | 105.91(8) |
| O11-Sm1-O4C  | 81.07(7)   | O8B-Sm1-O4C  | 154.99(7) |
| O7A-Sm1-O14D | 127.30(7)  | O2-Sm1-O14D  | 156.08(7) |
| O11-Sm1-O14D | 88.52(7)   | O8B-Sm1-O14D | 84.52(8)  |
| O4C-Sm1-O14D | 87.28(8)   | O7A-Sm1-O13D | 74.71(7)  |
| O2-Sm1-O13D  | 147.71(7)  | O11-Sm1-O13D | 137.75(7) |

|               |           |              |           |
|---------------|-----------|--------------|-----------|
| O8B-Sm1-O13D  | 75.01(8)  | O4C-Sm1-O13D | 81.24(8)  |
| O14D-Sm1-O13D | 52.59(7)  | O7A-Sm1-O9B  | 124.35(8) |
| O2-Sm1-O9B    | 77.24(8)  | O11-Sm1-O9B  | 70.07(7)  |
| O8B-Sm1-O9B   | 52.13(7)  | O4C-Sm1-O9B  | 149.10(7) |
| O14D-Sm1-O9B  | 81.32(8)  | O13D-Sm1-O9B | 112.91(7) |
| O18-Sm2-O6    | 73.35(9)  | O18-Sm2-O3C  | 152.40(8) |
| O6-Sm2-O3C    | 79.37(9)  | O18-Sm2-O12  | 81.96(8)  |
| O6-Sm2-O12    | 136.53(8) | O3C-Sm2-O12  | 122.13(7) |
| O18-Sm2-O17   | 84.13(10) | O6-Sm2-O17   | 74.33(8)  |
| O3C-Sm2-O17   | 92.57(9)  | O12-Sm2-O17  | 67.92(8)  |
| O18-Sm2-O16   | 89.30(9)  | O6-Sm2-O16   | 73.68(8)  |
| O3C-Sm2-O16   | 79.01(8)  | O12-Sm2-O16  | 142.10(7) |
| O17-Sm2-O16   | 147.90(8) | O18-Sm2-O1   | 73.24(8)  |
| O6-Sm2-O1     | 130.18(8) | O3C-Sm2-O1   | 124.15(8) |
| O12-Sm2-O1    | 72.12(7)  | O17-Sm2-O1   | 136.25(8) |
| O16-Sm2-O1    | 70.05(7)  | O18-Sm2-O2   | 123.77(8) |
| O6-Sm2-O2     | 140.91(7) | O3C-Sm2-O2   | 76.36(8)  |
| O12-Sm2-O2    | 82.55(7)  | O17-Sm2-O2   | 136.45(7) |
| O16-Sm2-O2    | 71.94(7)  | O1-Sm2-O2    | 50.56(6)  |
| O18-Sm2-O11   | 131.31(8) | O6-Sm2-O11   | 133.14(8) |
| O3C-Sm2-O11   | 71.96(7)  | O12-Sm2-O11  | 50.25(7)  |
| O17-Sm2-O11   | 70.86(7)  | O16-Sm2-O11  | 132.81(7) |
| O1-Sm2-O11    | 96.65(7)  | O2-Sm2-O11   | 65.63(6)  |

Symmetry codes: A : -x,y-1/2,-z+1/2; B: -x,y+1/2,-z+1/2; C:x,y-1,z; D:-x, -y, -z

**Table S3** Selected bond lengths (Å) and angles (°) for Eu-CP (**2**)

|          |            |          |          |
|----------|------------|----------|----------|
| Eu1-O7A  | 2.303(2)   | Eu1-O2   | 2.385(2) |
| Eu1-O11  | 2.3872(18) | Eu1-O8B  | 2.423(2) |
| Eu1-O4C  | 2.426(2)   | Eu1-O14D | 2.456(2) |
| Eu1-O13D | 2.488(2)   | Eu1-O9B  | 2.528(2) |

|               |           |              |           |
|---------------|-----------|--------------|-----------|
| Eu2-O18       | 2.336(2)  | Eu2-O6       | 2.358(2)  |
| Eu2-O3C       | 2.359(2)  | Eu2-O12      | 2.462(2)  |
| Eu2-O17       | 2.466(2)  | Eu2-O16      | 2.469(2)  |
| Eu2-O1        | 2.497(2)  | Eu2-O2       | 2.609(2)  |
| Eu2-O11       | 2.708(2)  |              |           |
| O7A-Eu1-O2    | 74.48(8)  | O7A-Eu1-O11  | 140.88(7) |
| O2-Eu1-O11    | 74.41(7)  | O7A-Eu1-O8B  | 81.10(7)  |
| O2-Eu1-O8B    | 91.27(7)  | O11-Eu1-O8B  | 122.62(7) |
| O7A-Eu1-O4C   | 85.14(8)  | O2-Eu1-O4C   | 105.19(7) |
| O11-Eu1-O4C   | 80.73(7)  | O8B-Eu1-O4C  | 154.88(7) |
| O7A-Eu1-O14D  | 127.77(7) | O2-Eu1-O14D  | 155.88(7) |
| O11-Eu1-O14D  | 88.02(7)  | O8B-Eu1-O14D | 84.33(8)  |
| O4C-Eu1-O14D  | 87.69(8)  | O7A-Eu1-O13D | 74.96(7)  |
| O2-Eu1-O13D   | 148.12(7) | O11-Eu1-O13D | 137.16(7) |
| O8B-Eu1-O13D  | 75.19(7)  | O4C-Eu1-O13D | 81.00(7)  |
| O14D-Eu1-O13D | 52.83(7)  | O7A-Eu1-O9B  | 124.28(7) |
| O2-Eu1-O9B    | 77.43(8)  | O11-Eu1-O9B  | 70.19(7)  |
| O8B-Eu1-O9B   | 52.43(7)  | O4C-Eu1-O9B  | 149.07(7) |
| O14D-Eu1-O9B  | 81.16(8)  | O13D-Eu1-O9B | 113.41(7) |
| O18-Eu2-O6    | 73.09(9)  | O18-Eu2-O3C  | 151.89(8) |
| O6-Eu2-O3C    | 79.07(9)  | O18-Eu2-O12  | 82.00(8)  |
| O6-Eu2-O12    | 136.34(8) | O3C-Eu2-O12  | 122.30(8) |
| O18-Eu2-O17   | 84.32(10) | O6-Eu2-O17   | 74.34(8)  |
| O3C-Eu2-O17   | 91.97(9)  | O12-Eu2-O17  | 67.89(8)  |
| O18-Eu2-O16   | 89.45(9)  | O6-Eu2-O16   | 73.87(8)  |
| O3C-Eu2-O16   | 79.06(8)  | O12-Eu2-O16  | 142.11(7) |
| O17-Eu2-O16   | 148.05(8) | O18-Eu2-O1   | 73.07(8)  |
| O6-Eu2-O1     | 129.73(8) | O3C-Eu2-O1   | 124.77(8) |

|             |           |             |           |
|-------------|-----------|-------------|-----------|
| O12-Eu2-O1  | 72.45(7)  | O17-Eu2-O1  | 136.52(8) |
| O16-Eu2-O1  | 69.75(7)  | O18-Eu2-O2  | 123.88(8) |
| O6-Eu2-O2   | 141.11(7) | O3C-Eu2-O2  | 76.91(8)  |
| O12-Eu2-O2  | 82.54(7)  | O17-Eu2-O2  | 136.21(7) |
| O16-Eu2-O2  | 71.87(7)  | O1-Eu2-O2   | 50.82(6)  |
| O18-Eu2-O11 | 131.36(8) | O6-Eu2-O11  | 133.06(8) |
| O3C-Eu2-O11 | 72.12(7)  | O12-Eu2-O11 | 50.32(6)  |
| O17-Eu2-O11 | 70.55(7)  | O16-Eu2-O11 | 132.74(7) |
| O1-Eu2-O11  | 97.21(7)  | O2-Eu2-O11  | 65.70(6)  |

Symmetry codes: A : -x, y-1/2, -z+1/2; B: x, y-1, z; C: -x, y+1/2, -z+1/2; D: -x, -y, -z

**Table S4** Selected bond lengths (Å) and angles (°) for Gd-CP (**3**)

|              |           |              |           |
|--------------|-----------|--------------|-----------|
| Gd1-O7A      | 2.285(3)  | Gd1-O2       | 2.366(2)  |
| Gd1-O11      | 2.372(2)  | Gd1-O4B      | 2.402(2)  |
| Gd1-O8C      | 2.405(2)  | Gd1-O14D     | 2.444(3)  |
| Gd1-O13D     | 2.476(2)  | Gd1-O9B      | 2.520(3)  |
| Gd2-O18      | 2.329(3)  | Gd2-O3B      | 2.345(3)  |
| Gd2-O6       | 2.347(3)  | Gd2-O12      | 2.439(3)  |
| Gd2-O17      | 2.446(3)  | Gd2-O16      | 2.448(3)  |
| Gd2-O1       | 2.486(2)  | Gd2-O2       | 2.601(2)  |
| Gd2-O11      | 2.693(3)  |              |           |
| O7A-Gd1-O2   | 74.67(9)  | O7A-Gd1-O11  | 140.70(9) |
| O2-Gd1-O11   | 73.95(9)  | O7A-Gd1-O4B  | 84.89(10) |
| O2-Gd1-O4B   | 104.47(9) | O11-Gd1-O4B  | 80.66(9)  |
| O7A-Gd1-O8C  | 81.32(9)  | O2-Gd1-O8C   | 92.18(9)  |
| O11-Gd1-O8C  | 122.79(8) | O4B-Gd1-O8C  | 154.74(9) |
| O7A-Gd1-O14D | 127.97(9) | O2-Gd1-O14D  | 155.74(9) |
| O11-Gd1-O14D | 87.94(9)  | O4B-Gd1-O14D | 87.93(10) |
| O8C-Gd1-O14D | 84.08(10) | O7A-Gd1-O13D | 74.81(9)  |

|               |            |              |            |
|---------------|------------|--------------|------------|
| O2-Gd1-O13D   | 148.32(9)  | O11-Gd1-O13D | 137.30(9)  |
| O4B-Gd1-O13D  | 80.99(9)   | O8C-Gd1-O13D | 75.03(9)   |
| O14D-Gd1-O13D | 53.17(9)   | O7A-Gd1-O9C  | 124.05(9)  |
| O2-Gd1-O9C    | 77.32(9)   | O11-Gd1-O9C  | 70.34(8)   |
| O4B-Gd1-O9C   | 149.36(9)  | O8C-Gd1-O9C  | 52.44(8)   |
| O14D-Gd1-O9C  | 81.49(10)  | O13D-Gd1-O9C | 113.87(9)  |
| O18-Gd2-O3B   | 151.16(10) | O18-Gd2-O6   | 72.92(10)  |
| O3B-Gd2-O6    | 78.51(10)  | O18-Gd2-O12  | 82.27(10)  |
| O3B-Gd2-O12   | 122.59(9)  | O6-Gd2-O12   | 136.32(10) |
| O18-Gd2-O17   | 84.79(12)  | O3B-Gd2-O17  | 91.31(12)  |
| O6-Gd2-O17    | 74.30(11)  | O12-Gd2-O17  | 68.02(10)  |
| O18-Gd2-O16   | 89.27(11)  | O3B-Gd2-O16  | 79.04(10)  |
| O6-Gd2-O16    | 73.93(10)  | O12-Gd2-O16  | 142.12(9)  |
| O17-Gd2-O16   | 148.03(10) | O18-Gd2-O1   | 72.85(10)  |
| O3B-Gd2-O1    | 125.52(10) | O6-Gd2-O1    | 129.65(10) |
| O12-Gd2-O1    | 72.37(9)   | O17-Gd2-O1   | 136.59(10) |
| O16-Gd2-O1    | 69.85(9)   | O18-Gd2-O2   | 123.99(9)  |
| O3B-Gd2-O2    | 77.49(9)   | O6-Gd2-O2    | 141.37(9)  |
| O12-Gd2-O2    | 82.29(9)   | O17-Gd2-O2   | 135.76(10) |
| O16-Gd2-O2    | 72.12(9)   | O1-Gd2-O2    | 51.15(8)   |
| O18-Gd2-O11   | 131.83(10) | O3B-Gd2-O11  | 72.35(9)   |
| O6-Gd2-O11    | 133.21(10) | O12-Gd2-O11  | 50.44(8)   |
| O17-Gd2-O11   | 70.69(9)   | O16-Gd2-O11  | 132.38(8)  |
| O1-Gd2-O11    | 97.12(8)   | O2-Gd2-O11   | 65.11(8)   |

Symmetry codes: A : -x, y-1/2, -z+1/2; B: x, y-1, z; C: -x, y+1/2, -z+1/2; D: -x, -y, -z

**Table S5** Selected bond lengths (Å) and angles (°) for Tb-CP (4)

|         |            |          |            |
|---------|------------|----------|------------|
| Tb1-O7A | 2.2769(19) | Tb1-O11  | 2.3502(18) |
| Tb1-O2  | 2.355(2)   | Tb1-O4B  | 2.390(2)   |
| Tb1-O8C | 2.398(2)   | Tb1-O14D | 2.422(2)   |

|               |           |              |           |
|---------------|-----------|--------------|-----------|
| Tb1-O13D      | 2.460(2)  | Tb1-O9C      | 2.502(2)  |
| Tb2-O18       | 2.304(3)  | Tb2-O3B      | 2.316(3)  |
| Tb2-O6        | 2.344(3)  | Tb2-O12      | 2.424(2)  |
| Tb2-O17       | 2.427(3)  | Tb2-O16      | 2.436(2)  |
| Tb2-O1        | 2.472(2)  | Tb2-O2       | 2.583(2)  |
| Tb2-O11       | 2.726(2)  |              |           |
| O7A-Tb1-O11   | 141.13(7) | O7A-Tb1-O2   | 74.85(8)  |
| O11-Tb1-O2    | 74.23(7)  | O7A-Tb1-O4B  | 84.74(8)  |
| O11-Tb1-O4B   | 79.99(7)  | O2-Tb1-O4B   | 103.18(7) |
| O7A-Tb1-O8C   | 80.99(7)  | O11-Tb1-O8C  | 123.45(7) |
| O2-Tb1-O8C    | 92.92(7)  | O4B-Tb1-O8C  | 154.89(7) |
| O7A-Tb1-O14D  | 128.49(7) | O11-Tb1-O14D | 86.84(7)  |
| O2-Tb1-O14D   | 155.28(7) | O4B-Tb1-O14D | 88.66(8)  |
| O8C-Tb1-O14D  | 84.26(8)  | O7A-Tb1-O13D | 75.01(7)  |
| O11-Tb1-O13D  | 136.27(7) | O2-Tb1-O13D  | 148.94(7) |
| O4B-Tb1-O13D  | 81.31(8)  | O8C-Tb1-O13D | 75.11(8)  |
| O14D-Tb1-O13D | 53.50(7)  | O7A-Tb1-O9C  | 123.86(8) |
| O11-Tb1-O9C   | 70.68(7)  | O2-Tb1-O9C   | 77.47(8)  |
| O4B-Tb1-O9C   | 149.40(7) | O8C-Tb1-O9C  | 52.77(7)  |
| O14D-Tb1-O9C  | 81.38(8)  | O13D-Tb1-O9C | 114.17(7) |
| O18-Tb2-O3B   | 151.19(9) | O18-Tb2-O6   | 72.59(9)  |
| O3B-Tb2-O6    | 78.71(9)  | O18-Tb2-O12  | 81.86(8)  |
| O3B-Tb2-O12   | 122.35(7) | O6-Tb2-O12   | 136.49(8) |
| O18-Tb2-O17   | 84.54(10) | O3B-Tb2-O17  | 90.26(10) |
| O6-Tb2-O17    | 74.47(9)  | O12-Tb2-O17  | 68.43(8)  |
| O18-Tb2-O16   | 90.30(9)  | O3B-Tb2-O16  | 79.09(8)  |
| O6-Tb2-O16    | 73.52(8)  | O12-Tb2-O16  | 142.43(8) |
| O17-Tb2-O16   | 147.56(9) | O18-Tb2-O1   | 73.19(9)  |

|             |           |             |           |
|-------------|-----------|-------------|-----------|
| O3B-Tb2-O1  | 125.93(9) | O6-Tb2-O1   | 129.04(8) |
| O12-Tb2-O1  | 72.47(7)  | O17-Tb2-O1  | 137.21(8) |
| O16-Tb2-O1  | 70.01(7)  | O18-Tb2-O2  | 124.50(8) |
| O3B-Tb2-O2  | 77.87(8)  | O6-Tb2-O2   | 141.51(7) |
| O12-Tb2-O2  | 82.00(7)  | O17-Tb2-O2  | 135.40(8) |
| O16-Tb2-O2  | 72.35(7)  | O1-Tb2-O2   | 51.24(6)  |
| O18-Tb2-O11 | 131.24(9) | O3B-Tb2-O11 | 72.28(8)  |
| O3C-Tb2-O11 | 133.99(9) | O12-Tb2-O11 | 50.34(7)  |
| O17-Tb2-O11 | 70.89(8)  | O16-Tb2-O11 | 132.02(8) |
| O1-Tb2-O11  | 96.97(8)  | O2-Tb2-O11  | 64.56(7)  |

Symmetry codes: A : -x, y-1/2, -z+1/2; B: x, y-1, z; C: -x, y+1/2, -z+1/2; D: -x, -y, -z

**Table S6** Selected bond lengths (Å) and angles (°) for Dy-CP (**5**)

|              |            |              |            |
|--------------|------------|--------------|------------|
| Dy1-O7A      | 2.267(3)   | Dy1-O2       | 2.348(3)   |
| Dy1-O11      | 2.347(3)   | Dy1-O4B      | 2.379(3)   |
| Dy1-O8C      | 2.389(3)   | Dy1-O14D     | 2.414(3)   |
| Dy1-O13D     | 2.460(3)   | Dy1-O9C      | 2.490(3)   |
| Dy2-O18      | 2.297(4)   | Dy2-O3B      | 2.303(3)   |
| Dy2-O6       | 2.344(3)   | Dy2-O12      | 2.413(3)   |
| Dy2-O17      | 2.416(3)   | Dy2-O16      | 2.425(3)   |
| Dy2-O1       | 2.465(3)   | Dy2-O2       | 2.580(3)   |
| Dy2-O11      | 2.743(3)   |              |            |
| O7A-Dy1-O2   | 74.80(11)  | O7A-Dy1-O11  | 141.30(10) |
| O2-Dy1-O11   | 74.45(10)  | O7A-Dy1-O4B  | 84.39(11)  |
| O2-Dy1-O4B   | 102.47(10) | O11-Dy1-O4B  | 79.89(10)  |
| O7A-Dy1-O8C  | 81.11(9)   | O2-Dy1-O8C   | 93.70(10)  |
| O11-Dy1-O8C  | 123.74(9)  | O4B-Dy1-O8C  | 154.63(11) |
| O7A-Dy1-O14D | 128.81(10) | O2-Dy1-O14D  | 155.06(10) |
| O11-Dy1-O14D | 86.32(10)  | O4B-Dy1-O14D | 89.29(11)  |



|               |            |              |            |
|---------------|------------|--------------|------------|
| O8C-Dy1-O14D  | 83.79(11)  | O7A-Dy1-O13D | 75.12(10)  |
| O2-Dy1-O13D   | 149.20(9)  | O11-Dy1-O13D | 135.60(10) |
| O4B-Dy1-O13D  | 81.02(11)  | O8C-Dy1-O13D | 75.21(11)  |
| O14D-Dy1-O13D | 53.73(9)   | O7A-Dy1-O9C  | 123.96(11) |
| O2-Dy1-O9C    | 77.72(9)   | O11-Dy1-O9C  | 70.72(9)   |
| O4B-Dy1-O9C   | 149.51(9)  | O8C-Dy1-O9C  | 53.05(9)   |
| O14D-Dy1-O9C  | 81.07(12)  | O13D-Dy1-O9C | 114.62(10) |
| O18-Dy2-O3B   | 150.88(12) | O18-Dy2-O6   | 72.81(12)  |
| O3B-Dy2-O6    | 78.12(12)  | O18-Dy2-O12  | 81.92(11)  |
| O3B-Dy2-O12   | 122.09(11) | O6-Dy2-O12   | 136.74(10) |
| O18-Dy2-O17   | 84.77(14)  | O3B-Dy2-O17  | 89.10(14)  |
| O6-Dy2-O17    | 74.31(11)  | O12-Dy2-O17  | 68.82(11)  |
| O18-Dy2-O16   | 90.56(13)  | O3B-Dy2-O16  | 79.52(12)  |
| O6-Dy2-O16    | 73.58(10)  | O12-Dy2-O16  | 142.30(10) |
| O17-Dy2-O16   | 147.49(11) | O18-Dy2-O1   | 73.20(12)  |
| O3B-Dy2-O1    | 126.74(11) | O6-Dy2-O1    | 128.99(12) |
| O12-Dy2-O1    | 72.56(10)  | O17-Dy2-O1   | 137.68(12) |
| O16-Dy2-O1    | 69.90(10)  | O18-Dy2-O2   | 124.80(11) |
| O3B-Dy2-O2    | 78.34(11)  | O6-Dy2-O2    | 141.41(10) |
| O12-Dy2-O2    | 81.84(10)  | O17-Dy2-O2   | 135.14(10) |
| O16-Dy2-O2    | 72.38(10)  | O1-Dy2-O2    | 51.61(9)   |
| O18-Dy2-O11   | 131.11(10) | O3B-Dy2-O11  | 72.28(10)  |
| O3C-Dy2-O11   | 133.87(11) | O12-Dy2-O11  | 50.17(10)  |
| O17-Dy2-O11   | 70.74(11)  | O16-Dy2-O11  | 131.89(10) |
| O1-Dy2-O11    | 97.12(10)  | O2-Dy2-O11   | 64.40(8)   |

Symmetry codes: A : -x, y-1/2, -z+1/2; B: x, y-1, z; C: -x, y+1/2, -z+1/2; D: -x, -y, -z

**Table S7** Selected bond lengths (Å) and angles (°) for Ho-CP (6)

|         |          |         |          |
|---------|----------|---------|----------|
| Ho1-O7A | 2.254(2) | Ho1-O2  | 2.334(2) |
| Ho1-O11 | 2.334(2) | Ho1-O4B | 2.362(3) |

|               |            |              |            |
|---------------|------------|--------------|------------|
| Ho1-O8C       | 2.373(3)   | Ho1-O14D     | 2.397(2)   |
| Ho1-O13D      | 2.444(3)   | Ho1-O9C      | 2.482(3)   |
| Ho2-O18       | 2.286(3)   | Ho2-O3B      | 2.287(3)   |
| Ho2-O6        | 2.333(3)   | Ho2-O12      | 2.392(2)   |
| Ho2-O17       | 2.399(3)   | Ho2-O16      | 2.402(3)   |
| Ho2-O1        | 2.444(3)   | Ho2-O2       | 2.557(2)   |
| Ho2-O11       | 2.744(3)   |              |            |
| O7A-Ho1-O2    | 74.81(9)   | O7A-Ho1-O11  | 141.30(9)  |
| O2-Ho1-O11    | 74.56(9)   | O7A-Ho1-O4B  | 84.36(9)   |
| O2-Ho1-O4B    | 101.87(9)  | O11-Ho1-O4B  | 79.39(9)   |
| O7A-Ho1-O8C   | 80.92(9)   | O2-Ho1-O8C   | 94.13(9)   |
| O11-Ho1-O8C   | 124.32(8)  | O4B-Ho1-O8C  | 154.60(9)  |
| O7A-Ho1-O14D  | 129.11(9)  | O2-Ho1-O14D  | 154.85(8)  |
| O11-Ho1-O14D  | 85.88(9)   | O4B-Ho1-O14D | 89.60(10)  |
| O8C-Ho1-O14D  | 83.85(10)  | O7A-Ho1-O13D | 75.14(9)   |
| O2-Ho1-O13D   | 149.36(8)  | O11-Ho1-O13D | 135.14(9)  |
| O4B-Ho1-O13D  | 80.96(9)   | O8C-Ho1-O13D | 75.33(9)   |
| O14D-Ho1-O13D | 54.03(8)   | O7A-Ho1-O9C  | 123.44(9)  |
| O2-Ho1-O9C    | 77.31(9)   | O11-Ho1-O9C  | 71.15(9)   |
| O4B-Ho1-O9C   | 149.71(9)  | O8C-Ho1-O9C  | 53.24(8)   |
| O14D-Ho1-O9C  | 81.54(10)  | O13D-Ho1-O9C | 115.34(9)  |
| O18-Ho2-O3B   | 150.79(10) | O18-Ho2-O6   | 72.57(10)  |
| O3B-Ho2-O6    | 78.25(10)  | O18-Ho2-O12  | 81.76(10)  |
| O3B-Ho2-O12   | 122.12(9)  | O6-Ho2-O12   | 136.70(9)  |
| O18-Ho2-O17   | 85.10(12)  | O3B-Ho2-O17  | 88.47(12)  |
| O6-Ho2-O17    | 74.58(10)  | O12-Ho2-O17  | 68.91(11)  |
| O18-Ho2-O16   | 91.15(11)  | O3B-Ho2-O16  | 79.22(10)  |
| O6-Ho2-O16    | 73.51(10)  | O12-Ho2-O16  | 142.46(10) |

|             |            |             |            |
|-------------|------------|-------------|------------|
| O17-Ho2-O16 | 147.50(11) | O18-Ho2-O1  | 73.36(10)  |
| O3B-Ho2-O1  | 126.83(10) | O6-Ho2-O1   | 128.66(10) |
| O12-Ho2-O1  | 72.67(9)   | O17-Ho2-O1  | 138.10(11) |
| O16-Ho2-O1  | 69.99(9)   | O18-Ho2-O2  | 125.13(9)  |
| O3B-Ho2-O2  | 78.37(10)  | O6-Ho2-O2   | 141.54(8)  |
| O12-Ho2-O2  | 81.75(9)   | O17-Ho2-O2  | 134.52(10) |
| O16-Ho2-O2  | 72.42(9)   | O1-Ho2-O2   | 51.77(8)   |
| O18-Ho2-O11 | 130.91(9)  | O3B-Ho2-O11 | 72.25(8)   |
| O6-Ho2-O11  | 133.95(9)  | O12-Ho2-O11 | 50.19(8)   |
| O17-Ho2-O11 | 70.15(9)   | O16-Ho2-O11 | 131.77(8)  |
| O1-Ho2-O11  | 97.38(8)   | O2-Ho2-O11  | 64.38(7)   |

Symmetry codes: A :  $-x, y-1/2, -z+1/2$ ; B:  $x, y-1, z$ ; C:  $-x, y+1/2, -z+1/2$ ; D:  $-x, -y, -z$ .

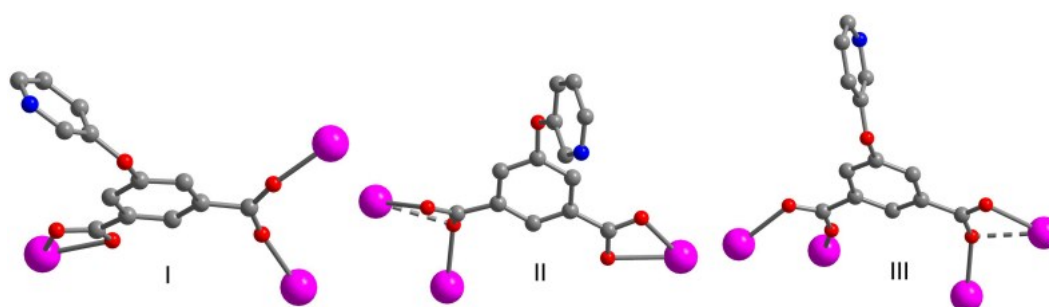

**Fig. S1** The coordination modes of L ligand.

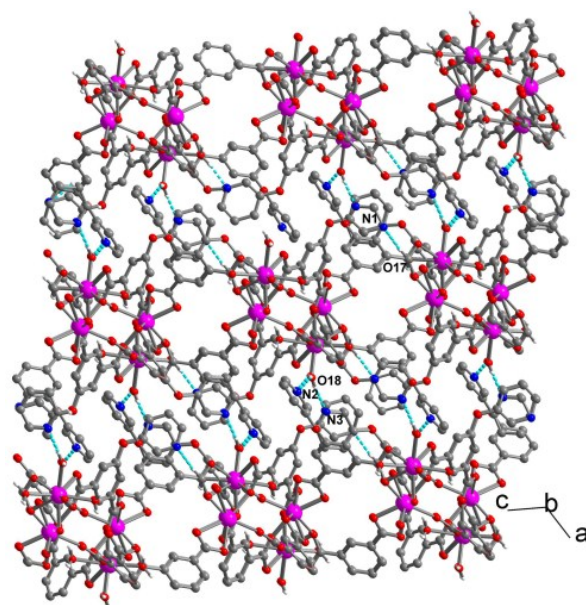

**Fig. S2** The 3D packing of the layers in Eu-CP (2) through hydrogen bonding interactions.

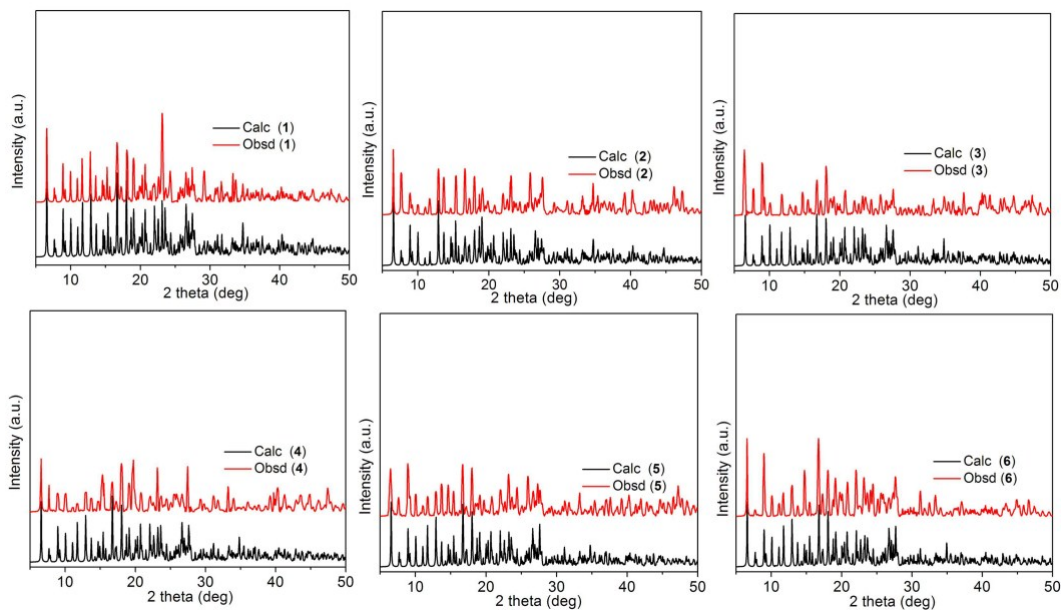

**Fig. S3** PXR D patterns of CPs 1-6.

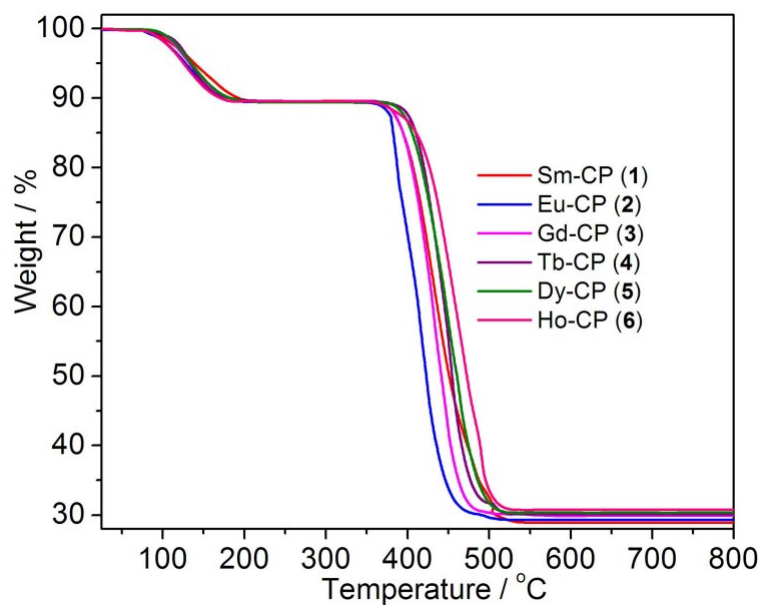

**Fig. S4** TGA Plots of CPs 1-6.

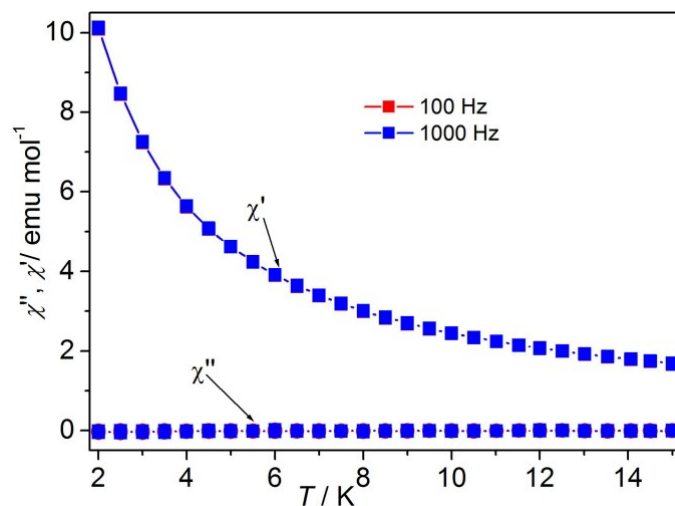

**Fig. S5** The ac susceptibilities of Ho-CP (**6**) measured at 2 K under  $H_{dc} = 0$  fields.

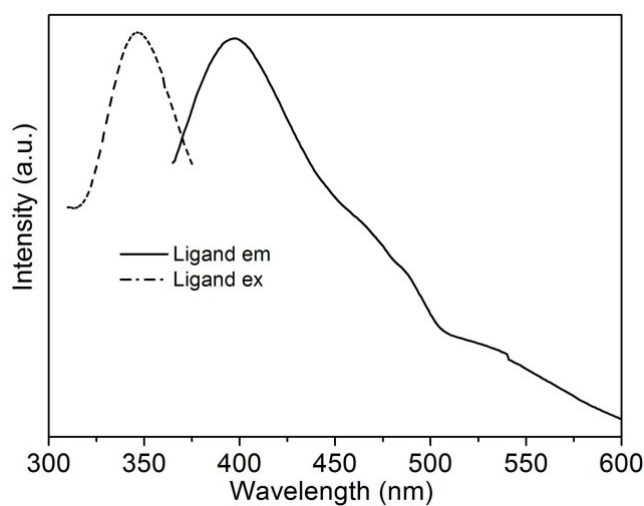

**Fig. S6** Solid state emission and excitation spectra of the L ligand at 298 K.

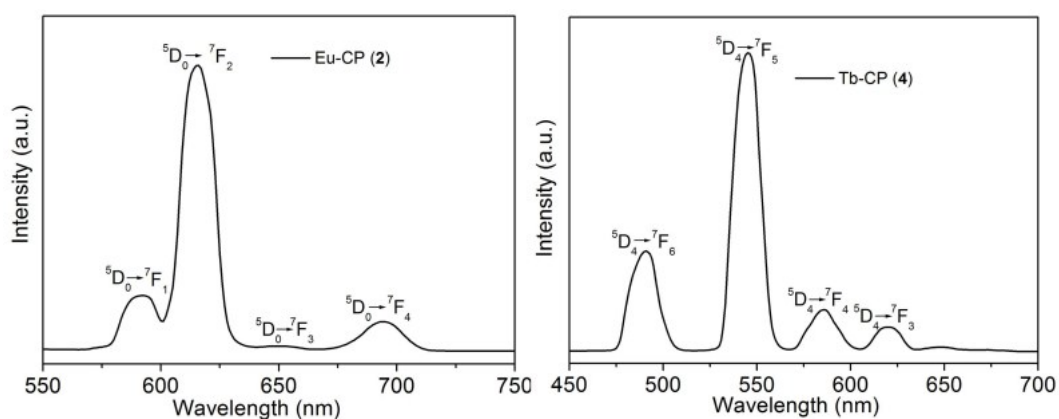

**Fig. S7** Solid sample emission spectra of Eu-CP (**2**) and Tb-CP (**4**) under room temperature.

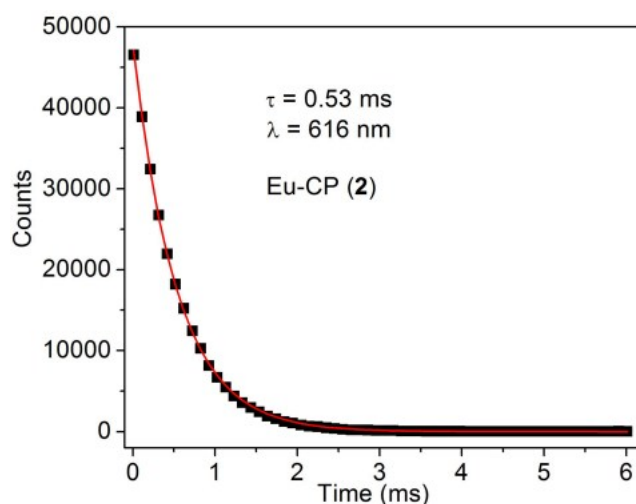

**Fig. S8** Decay time of Eu-CP (2).

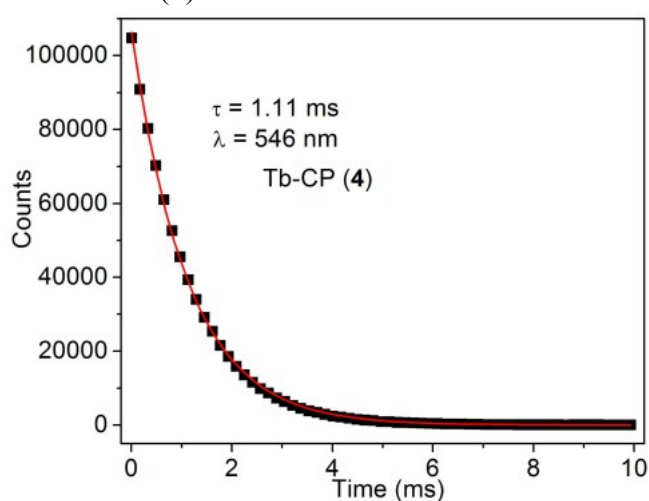

**Fig. S9** Decay time of Tb-CP (4).

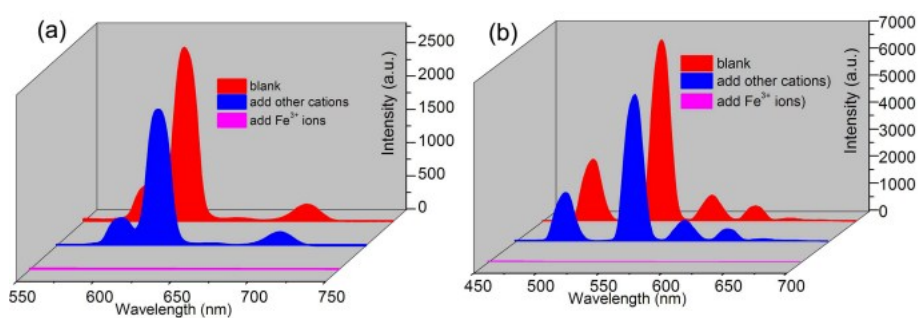

**Fig. S10** Luminescence spectra of Eu-CP (2) (a) and Tb-CP (4) (b) dispersed in aqueous solution in the presence of a mixture of other metal cations ( $\text{K}^+$ ,  $\text{Li}^+$ ,  $\text{Mg}^{2+}$ ,  $\text{Na}^+$ ,  $\text{Al}^{3+}$ ,  $\text{Cr}^{3+}$ ,  $\text{Mg}^{2+}$ ,  $\text{Zn}^{2+}$ ,  $\text{Ag}^+$ ,  $\text{Cd}^{2+}$ ,  $\text{Ni}^{2+}$ ,  $\text{Cu}^{2+}$ ,  $\text{Hg}^{2+}$ ,  $\text{Fe}^{2+}$ ) and a mixture of other metal cations with  $\text{Fe}^{3+}$  ions. The concentration and volume for both  $\text{Fe}^{3+}$  and the interfering cations were 1 mM and 3 mL.

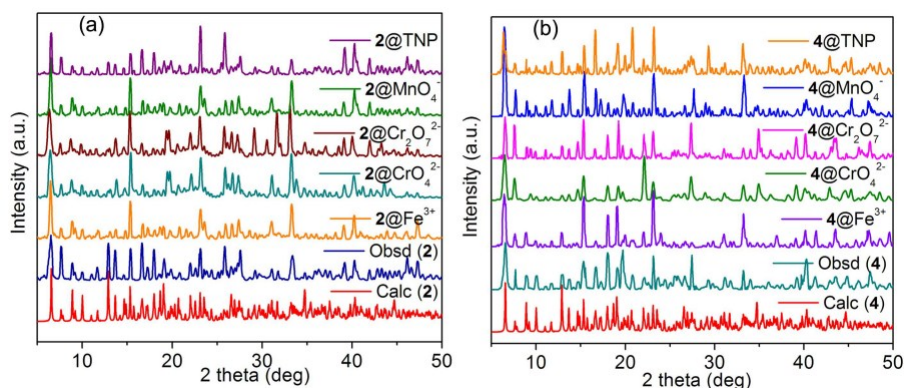

**Fig. S11** The PXRD data of the as-synthesized Eu-CP (**2**) (a) and Tb-CP (**4**) (b) after  $\text{Fe}^{3+}$ ,  $\text{MO}_4^-$ ,  $\text{CrO}_4^{2-}$ ,  $\text{Cr}_2\text{O}_7^{2-}$  and TNP sensing process, with the simulated result as reference.

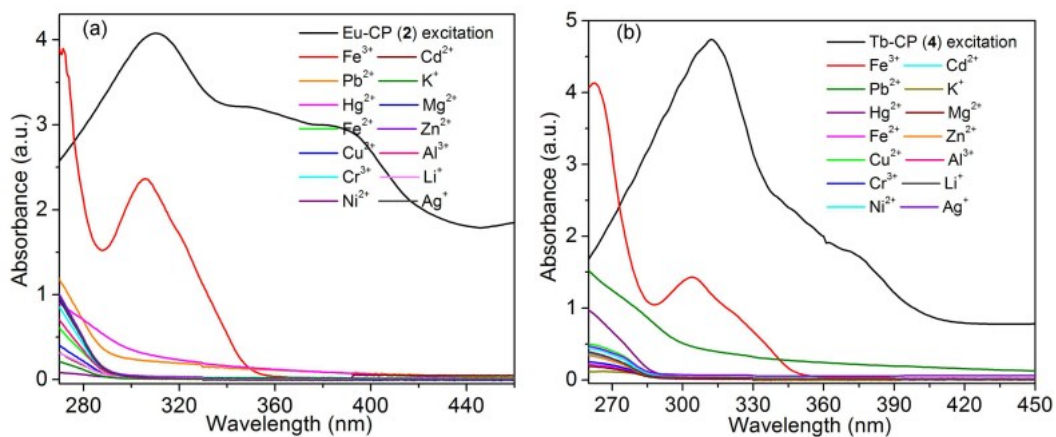

**Fig. S12** UV-vis spectra of Eu-CP (**2**) (a) and Tb-CP (**4**) (b) containing different cations (1 mM) and corresponding excitation spectrum.



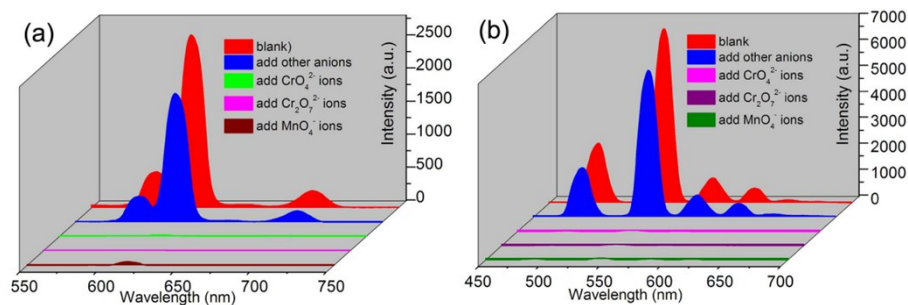

**Fig. S13** Luminescence spectra of Eu-CP (2) (a) and Tb-CP (4) (b) dispersed in aqueous solution in the presence of a mixture of other anions (IO<sub>3</sub><sup>-</sup>, SO<sub>4</sub><sup>2-</sup>, I<sup>-</sup>, NO<sub>3</sub><sup>-</sup>, ClO<sub>3</sub><sup>-</sup>, Cl<sup>-</sup>, CO<sub>3</sub><sup>2-</sup>, Br<sup>-</sup>) and a mixture of other anions with CrO<sub>4</sub><sup>2-</sup>, Cr<sub>2</sub>O<sub>7</sub><sup>2-</sup> or MnO<sub>4</sub><sup>-</sup> ions. The concentration and volume for both CrO<sub>4</sub><sup>2-</sup>/Cr<sub>2</sub>O<sub>7</sub><sup>2-</sup>/MnO<sub>4</sub><sup>-</sup> and the interfering cations were 1 mM and 3 mL.

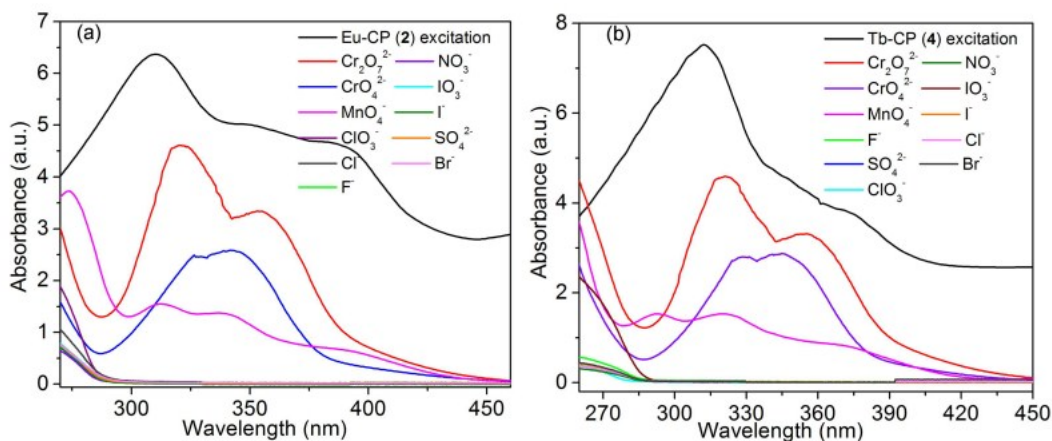

**Fig. S14** UV-vis spectra of Eu-CP (2) (a) and Tb-CP (4) (b) containing different anions (1 mM) and corresponding excitation spectrum.

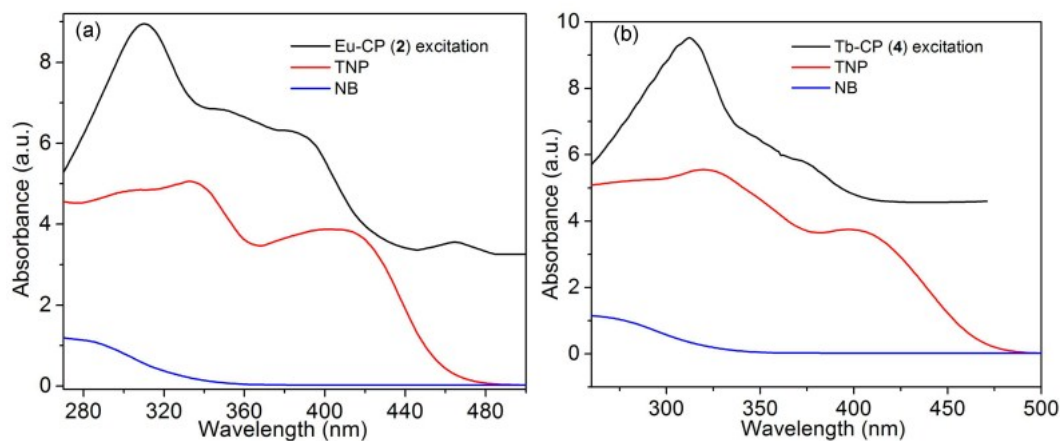

**Fig. S15** UV-vis spectra of Eu-CP (2) (a) and Tb-CP (4) (b) containing different anions (1 mM) and corresponding excitation spectrum.
